Development 140, 687 (2013) doi:10.1242/dev.092239  
© 2013. Published by The Company of Biologists Ltd

## Epigenetic reprogramming in somatic cells induced by extract from germinal vesicle stage pig oocytes

**Hong-Thuy Bui\***, Deug-Nam Kwon, Min-Hui Kang, Mi-Hye Oh, Mi-Ryung Park, Woo-Jin Park, Seung-Sam Paik, Nguyen Van Thuan and Jin-Hoi Kim\*

There was an error published in *Development* **139**, 4330-4340.

Nguyen Van Thuan was incorrectly listed as an author for correspondence. The correct authors for correspondence are shown below:

\*Authors for correspondence ([bthuy@konkuk.ac.kr](mailto:bthuy@konkuk.ac.kr); [jhkim541@konkuk.ac.kr](mailto:jhkim541@konkuk.ac.kr)).

The authors apologise to Nguyen Van Thuan and to readers for this mistake.
